# Supplementary material
Source: HighWire-hosted journal article supplement (https://rapm.bmj.com/highwire/filestream/21229/field_highwire_adjunct_files/0/rapm-2023-104389supp001_data_supplement.pdf)
Supplement: rapm-2023-104389supp001_data_supplement.pdf [file rapm-2023-104389supp001_data_supplement.pdf]

**Appendix A.** Data Safety Monitoring Board and Recruiting Site Investigators***Data Safety Monitoring Board*****Beverly A. Morris, RN, ANP-BC, MBA** (Chair, Medical Monitor and Participant Advocate)

University of California San Diego

San Diego, California

**Peter Szmuk, MD**

University of Texas Southwestern and Children's Health Medical Center

Dallas, Texas

**Gerald J. Beck, PhD** (statistician)

Cleveland Clinic

Cleveland, Ohio

***Recruiting Site Investigators (PAINfRE Investigators)*****Baharin Abdullah, MD**

University of California San Diego

San Diego, California

COI: Epimed (Dallas, Texas, research funding), Infutronics (Natick, Massachusetts, research

funding), Avanos Medical (Irvine, California, research funding), and SPR Therapeutics (Cleveland, Ohio, research funding)

**Pedram Aleshi, MD**

University of California San Francisco

San Francisco, California

COI: none

**Michael J. Buys, MD**

University of Utah

Salt Lake City, Utah

COI: none

**Juan P. Cata, MD**

University of Texas, MD Anderson Cancer Center

Houston, Texas

COI: none

**Grace Chen, MD**

Oregon Health Sciences University

Portland, Oregon

COI: none

**Gildasio S. De Oliveira, MD, MBA, MSCI**

Brown University

Providence, Rhode Island

COI: none

**Hesham Elsharkawy, MD, MBA, M.Sc, FASA**

Case Western Reserve University

Cleveland, Ohio

COI: SPR Therapeutics (Cleveland, Ohio), Neuronoff (Cleveland, Ohio), Gate Science, Moltonborough, New Hampshire)

**John J. Finneran IV, MD**

University of California San Diego

San Diego, California

COI: Epimed (Dallas, Texas, research funding), Infutronics (Natick, Massachusetts, research funding), Avanos Medical (Irvine, California, research funding), and SPR Therapeutics (Cleveland, Ohio, research funding)

**Toni Ganaway, BA**

VA Palo Alto Health Care System

Palo Alto, California

COI: none

**Anya M. Ilfeld, MA, MSN, RN, PHN**

Rady's Hospital

San Diego, California

COI: none

**Prathima Kalasbail, MD**

Medical Director, Consultant to Network Partners Group

Warsaw, IN

COI: none

**Mark C. Kendall, MD**

Brown University

Providence, Rhode Island

COI: none

**Mohammad Zafeer Khan, MD**

Cleveland Clinic

Cleveland, Ohio

COI: none

**Sandra Kopp, MD**

Mayo Clinic

Rochester, Minnesota

COI: none

**Vanessa J. Loland, MD**

University of Washington

Seattle, Washington

COI: none

**Anthony T. Machi, MD**

University of Texas, Southwestern Medical Center

Dallas, Texas

COI: Fresenius Kabi (consulting work, Bad Homburg, Germany)

**Tariq Malik, MD**

University of Chicago

Chicago, Illinois

COI: none

**Stavros G. Memtsoudis, MD, PhD, MBA**

Hospital of Special Surgery, Weill Cornell Medical College

New York, New York

COI:

**Andres Missair, MD, EDRA**

Miami Veterans Affairs Hospital

Miami, Florida

COI: Avanos (Alpharetta, Georgia, consultant); Sonosite (Bothell, Washington, educational support)

**Loran Mounir-Soliman, MD**

Scope Anesthesia of North Carolina, PLLC

Charlotte, North Carolina

COI: Pacira Pharmaceuticals (Parsippany, NJ, consultant) and B. Braun (Irvine, CA, consultant)

**Kamen V. Vlassakov, MD**

Brigham and Women's Hospital / Harvard Medical School

Boston, Massachusetts

COI: none

**Lisa Warren, MD**

Massachusetts General Hospital / Harvard Medical School

Boston, Massachusetts

COI: none

**Glenn E. Woodworth, MD**

Oregon Health and Science University

Portland, Oregon

COI: none

**Adam C. Young, MD**

Illinois Bone & Joint Institute

Morton Grove, Illinois

COI: None
